# Supplementary material
Source: publisher figshare collection journal article supplement (https://geolsoc.figshare.com/articles/dataset/_/3452987)
Supplement: Supplementary file 1 [file 1]

GrappEl - a simple spreadsheet application for managing and disseminating graptolite biozonal range chart data

Michael P.A. Howe (2011)

Proceedings of the Yorkshire Geological Society.

#### SUPPLEMENTARY DATA

Three zipped files are provided, one for the Ordovician of Scotland, one for the Ordovician of England & Wales and one for the Silurian of Britain.

Download the required files and unzip them, keeping the contents of each in a separate folder.

Four versions of each spreadsheet are provided. Please try the version suffixed "\_Filtered" first. This is an Excel 2007 spreadsheet with the filtering option preset.

If this does not work, the following alternatives should be tried:

- |               |                                                                  |
|---------------|------------------------------------------------------------------|
| _Simple       | Excel 2007 spreadsheet without the filtering option preset.      |
| _97-2003      | Excel 97 - 2003 spreadsheet without the filtering option preset. |
| _OpenDocument | Open format version                                              |

#### PLEASE NOTE

1. The files are intended to be illustrative of the method rather than an authoritative reference.
2. The files have been assembled over the past 10 years from earlier versions of the data used to produce Zalasiewicz et al. 2009.

Whilst most of the changes made in the final printed version of the range chart have been incorporated, the accuracy cannot be guaranteed.

3. Any conclusions derived from using the spreadsheets must be checked against the published version of Zalasiewicz et al. 2009.
4. Any reference to the range chart data should cite Zalasiewicz et al. 2009.
